# Supplementary material
Source: Springer Nature journal article supplement (https://www.springermedizin.de/resource/supplementary/13054_2010_8862_MOESM4_ESM.pdf/9732774)

Sensitivity

SROC Curve

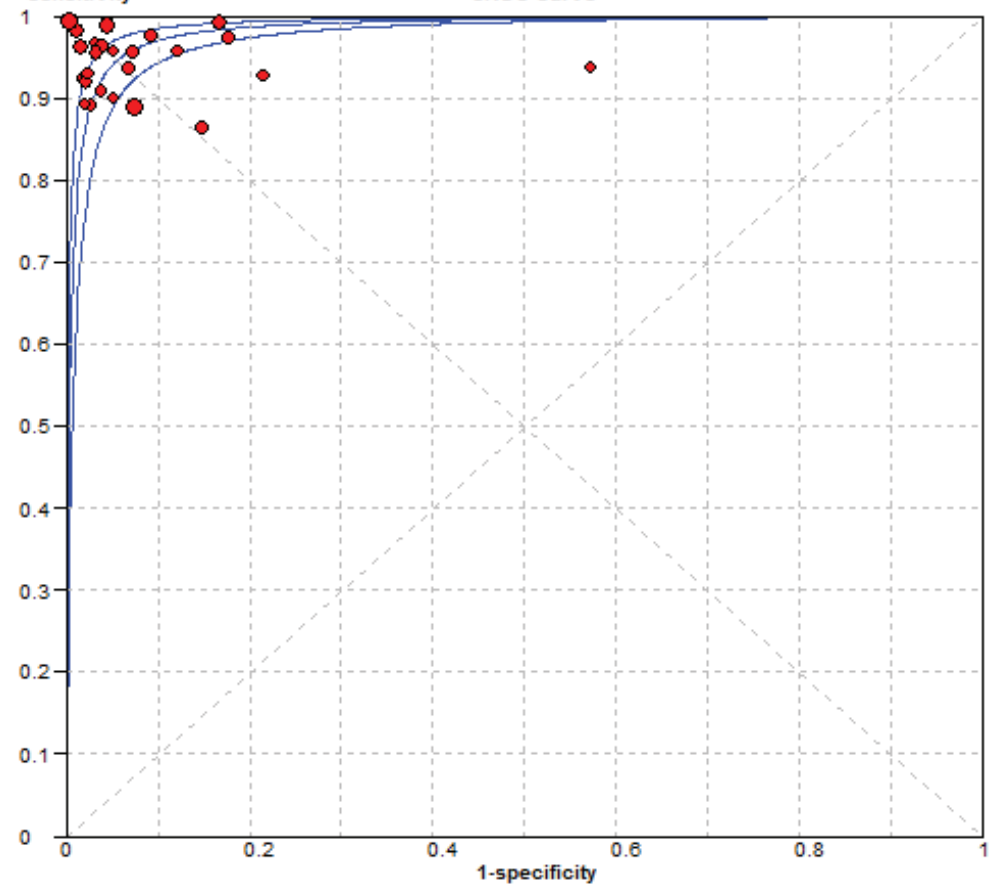

Symmetric SROC  
AUC = 0.9840  
SE(AUC) = 0.0042  
 $Q^* = 0.9451$   
SE( $Q^*$ ) = 0.0086

Supplement: MOESM4 [file 9732774]
